# Supplementary material
Source: PubMed Central journal article supplement (PMC3294442)
Supplement: supp_11.3.324_FigS1-S2_TableS1-S2.pdf [file supp_11.3.324_FigS1-S2_TableS1-S2.pdf]

# Figure S1

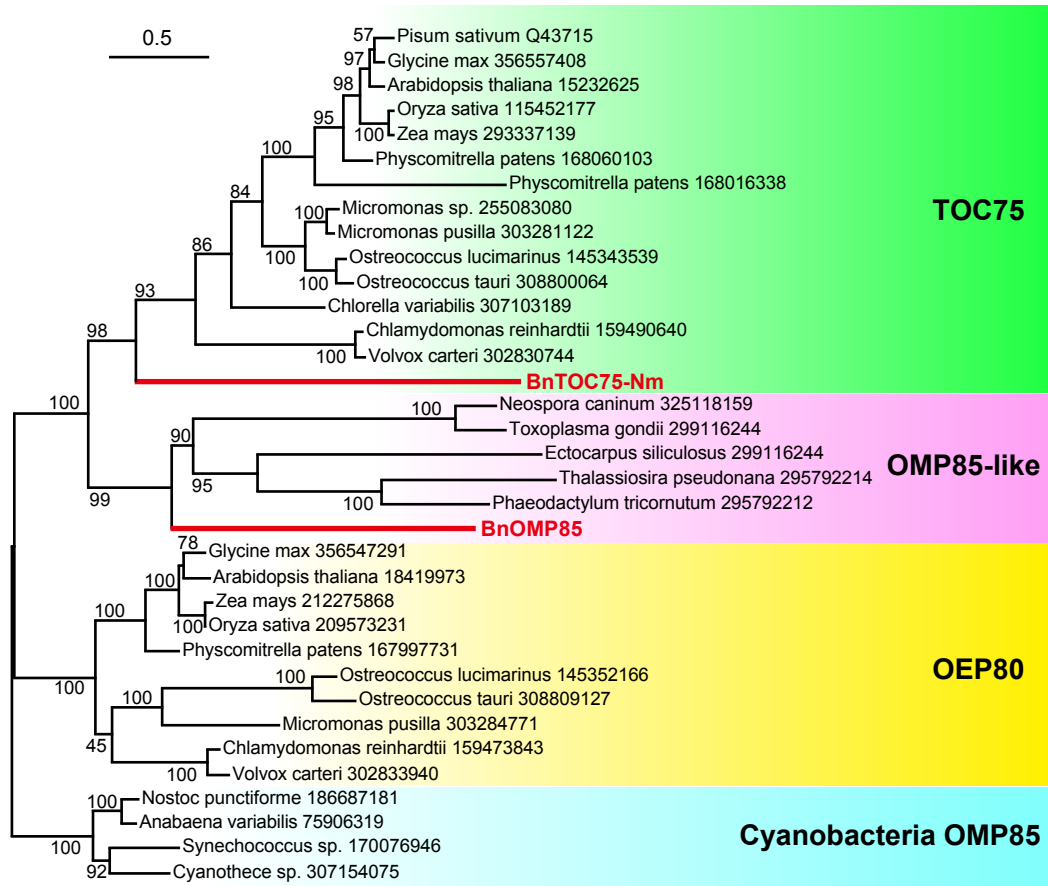

Figure S1. ML phylogenetic tree for OMP85 homologs of plants, green algae, cyanobacteria, and chlorarachniophytes. The number next to the species names indicate GenBank ID. The values at nodes are the bootstrap support and indicated when higher than 50%. The scale bar represents the estimated number of amino acid substitutions per site.

# Figure S2

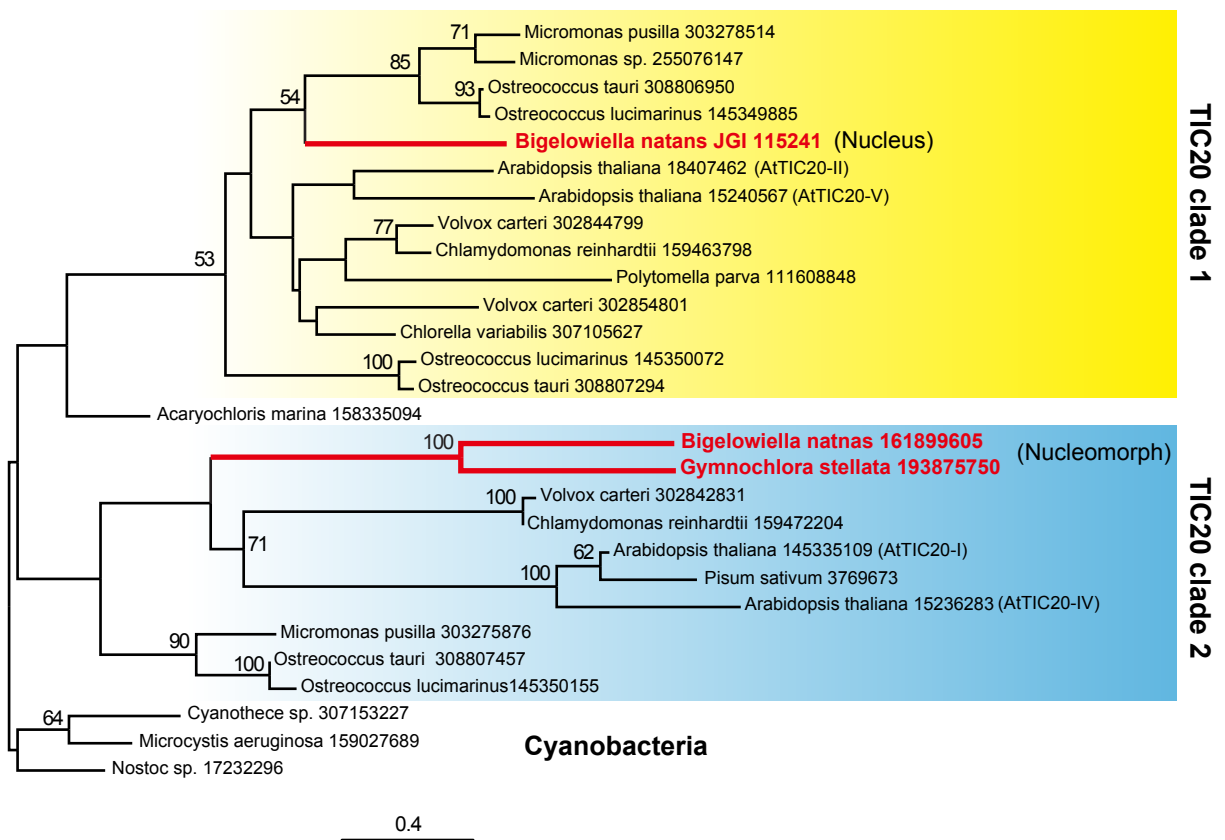

Figure S2. ML phylogenetic tree for TIC20 homologs of plants, green algae, cyanobacteria, and chlorarachniophytes. The number next to the species names indicate GenBank or JGI protein ID. The values at nodes are the bootstrap support and indicated when higher than 50%. The scale bar represents the estimated number of amino acid substitutions per site.

Supporting information

Table S1. The PCR primers used for 5' and 3' RACE of TOC and TIC genes.

| fragment names | primer names | sequences (5' to 3')                |
|----------------|--------------|-------------------------------------|
| TIC20-5'RACE   | 5'RACE Outer | GCTGATGGCGATGAATGAACACTG            |
|                | 5'RACE Inner | CGCGGATCCGAACACTGCGTTTGCTGGCTTTGATG |
|                | TIC20-R1     | GCATCAGCCGCATTTCCTCAACTAAC          |
|                | TIC20-R2     | CCATAGCCCACAGAGCAAAACACG            |
| TIC21-3'RACE   | TIC21-F1     | ATGGTCCCGACATCATTGGCCTGCCT          |
|                | TIC21-F2     | CACCGTTGGGGTCACGAGAGCATCT           |
|                | 3'RACE Outer | GCGAGCACAGAATTAATACGACT             |
|                | 3'RACE Inner | CGCGGATCCGAATTAATACGACTCACTATAGG    |
| TIC32-5'RACE   | 5'RACE Outer | GCTGATGGCGATGAATGAACACTG            |
|                | 5'RACE Inner | CGCGGATCCGAACACTGCGTTTGCTGGCTTTGATG |
|                | TIC32-R1     | GGAGAGATTCAAGGTCGGCCTC              |
|                | TIC32-R2     | CCTCAGTACCTCCGGTGATGAC              |
| TIC40-5'RACE   | 5'RACE Outer | GCTGATGGCGATGAATGAACACTG            |
|                | 5'RACE Inner | CGCGGATCCGAACACTGCGTTTGCTGGCTTTGATG |
|                | TIC40-R1     | AATCCAGAGGCTTGCGGAGCG               |
|                | TIC40-R2     | CTCGGGCGACTGAGCCTTACC               |
| TIC40-3'RACE   | TIC40-F1     | GATACGTCGGGTGGGGTACACCTT            |
|                | TIC40-F2     | GCAATGAATGGCATGAACGGC               |
|                | 3'RACE Outer | GCGAGCACAGAATTAATACGACT             |
|                | 3'RACE Inner | CGCGGATCCGAATTAATACGACTCACTATAGG    |
| OMP85-5'RACE   | 5'RACE Outer | GCTGATGGCGATGAATGAACACTG            |
|                | 5'RACE Inner | CGCGGATCCGAACACTGCGTTTGCTGGCTTTGATG |
|                | OMP85-R1     | GAAACCCTTCTTCGCGTAGTAACCATG         |
|                | OMP85-R2     | GCTCTACAACATCGGATATGAGCGTAAC        |
| OMP85-middle   | OMP85-F1     | TTACGCTCATATCCGATGTTGTAGAGCC        |
|                | OMP85-R3     | TGATGCAGGACCTATCTCTCCATCCT          |
| OMP85-3'RACE   | OMP85-F1     | TTACGCTCATATCCGATGTTGTAGAGCC        |
|                | OMP85-F2     | AGGATGGAGAGATAGGTCCTGCATCA          |
|                | 3'RACE Outer | GCGAGCACAGAATTAATACGACT             |
|                | 3'RACE Inner | CGCGGATCCGAATTAATACGACTCACTATAGG    |

Outer and #1 primers were used for first PCR, and inner and #2 primers used for nested second PCR.

Table S2. The PCR primers used to amplify cDNA of Der1-like proteins.

| fragment names | primer names | sequences (5' to 3')         |
|----------------|--------------|------------------------------|
| BnDer1-49642   | BnDer49-F    | ACCAAGCTTATGTCGATGAGCCCGGAGG |
|                | BnDer49-R    | TCACCATGGTAAATGGATTCGGCAAAG  |
| BnDer1-92850   | BnDer92-F    | ACCAAGCTTATGAGCCTTGAACAGGTTG |
|                | BnDer92-Up   | GTATTTGCCAAGGGTGCTCCTA       |
|                | BnDer92-Dw   | TAGGAGCACCCCTTGGCAAATAC      |
|                | BnDer92-R    | TCACCATGGACTCTACTCCTTCGTCACC |

An *Nco*I site within the BnDer1-92850 fragment was deleted by the PCR-based site-directed mutagenesis technique using BnDer92-UP and –DW primers.
